# Supplementary material for: Disentangling the Janus-faced effects of cations in electrocatalysis
Source: Research Square preprint supplement (doi:10.21203/rs.3.rs-7869944/v1), 2025-10-21
Supplement: Supplementary file 1 [file 5bf11e8f78cf396b37c27205.docx]

Supporting Information

Disentangling the Janus-faced effects of cations in electrocatalysis

Xinwei Zhu, a,b,* Tobias Binninger, a Marc T.M. Koper, c Michael Eikerling a,b,*

*a Theory and Computation of Energy Materials (IET-3), Institute of Energy Technologies, Forschungszentrum Jülich GmbH, 52425 Jülich, Germany*

*b Chair of Theory and Computation of Energy Materials, Faculty of Georesources and Materials Engineering, RWTH Aachen University, 52062 Aachen, Germany*

*c Leiden Institute of Chemistry, Leiden University, 2333CC Leiden, The Netherlands*

** Corresponding authors:*

*Xinwei Zhu:* *x.zhu.electrochem@gmail.com*

*Michael Eikerling: m.eikerling@fz-juelich.de*

| 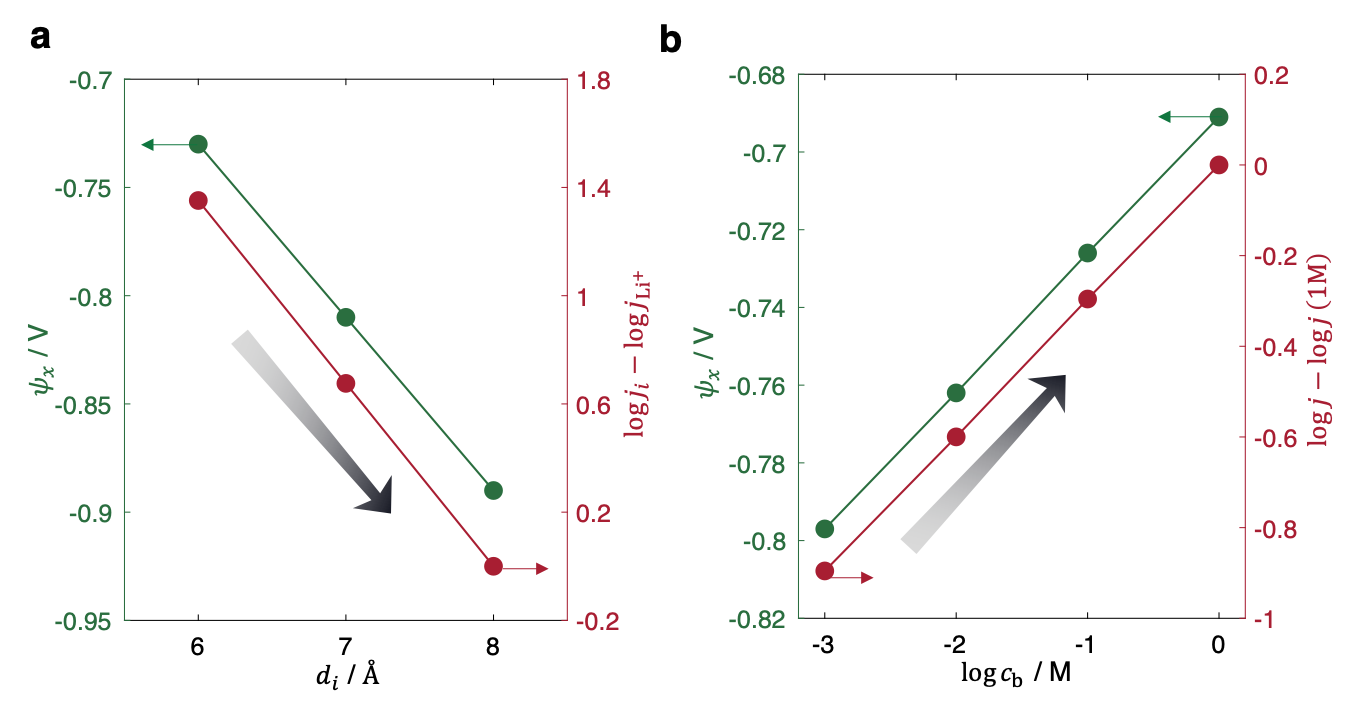 |
| --- |
| Figure S1: (a) Dependence of (assumed and HER rate on effective cation size, using . (b) Dependence of and HER rate on supporting cation concentration, using . The results are calculated using Eqs. 1 and 2. is set to the typical value of 0.5. versus the reversible hydrogen electrode (RHE) and pH = 13. Other parameters are given in Table 1. |

| 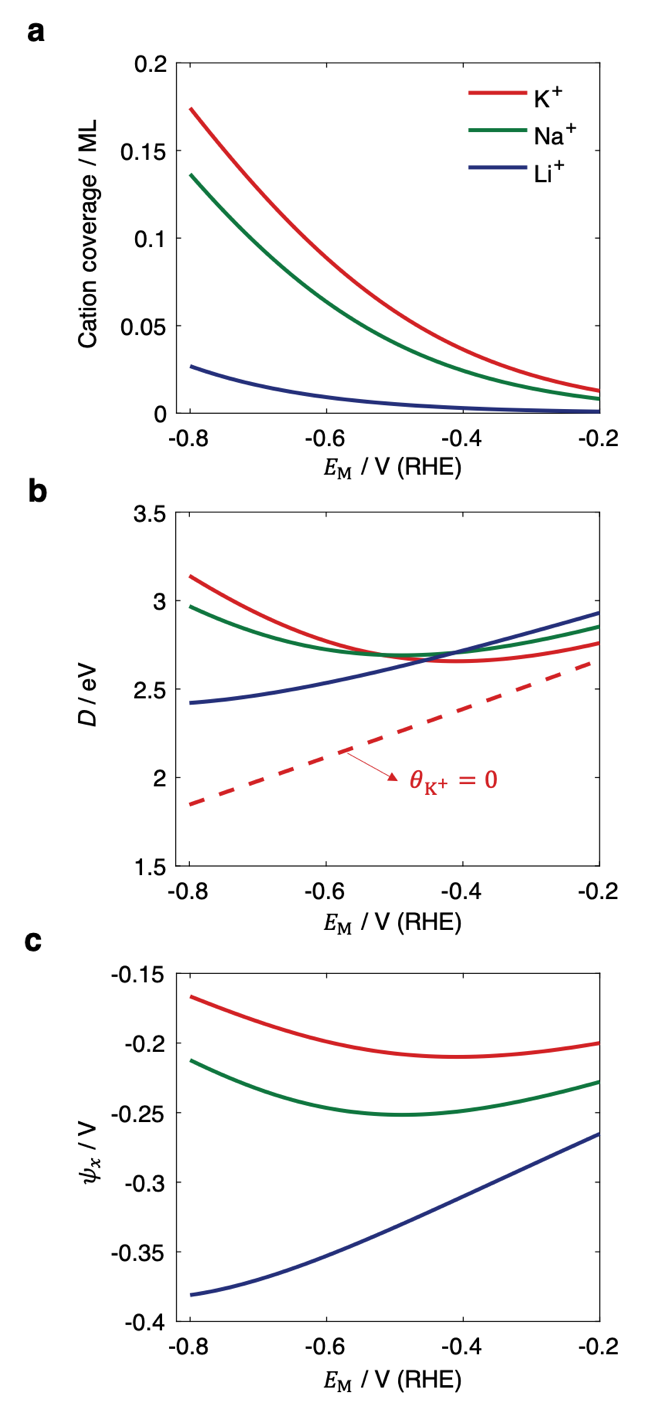 |
| --- |
| Figure S2: (a) Simulated cation coverages on Au in 0.1 M KOH, NaOH, and LiOH. (b) Simulated H-OH bond strength as the function of applied potential. The result for K+ without considering cation adsorption is shown for comparison. (c) Simulated (assumed ) as the function of applied potential. Parameters used are given in Table 1. |

| 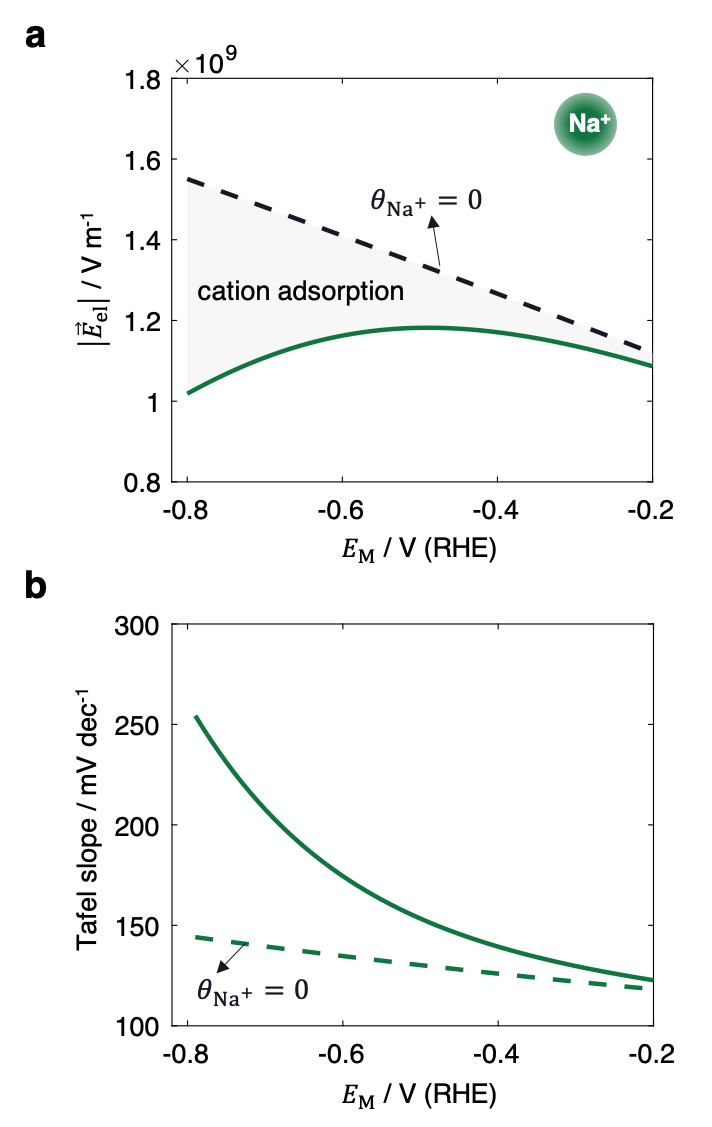 |
| --- |
| Figure S3: (a) Calculated electric field strength within the OHL for Na⁺. (b) Influence of Na⁺ adsorption on the Tafel slope. Parameters used are given in Table 1. |

| 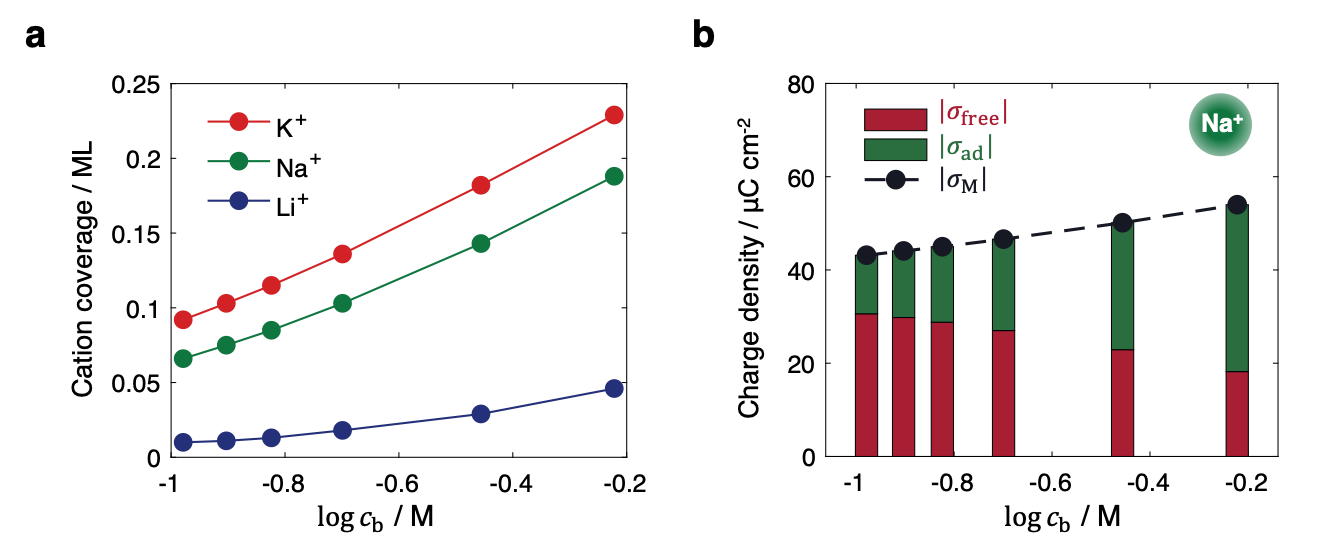 |
| --- |
| Figure S4: (a) Influence of cation concentration on cation adsorption coverages. (b) Influence of cation concentration on surface charge densities for Na⁺. versus RHE and pH = 13. The results are simulated using Eqs. 3-8 and parameters given in Table 1. |
